# Supplementary material
Source: Research Square preprint supplement (doi:10.21203/rs.3.rs-9743777/v1)
Supplement: Supplementary file 1 [file 3d5027aa9de09da308895033.docx]

| **Database** | **Search Strategy** |
| --- | --- |
| **PubMed** | (“Artificial Intelligence”[Mesh] OR “Machine Learning”[Mesh] OR “Deep Learning” OR “artificial intelligence” OR “machine learning” OR “deep learning”) AND (“Coronary Angiography”[Mesh] OR “quantitative coronary angiography” OR “QCA” OR “AI-QCA”) AND (“Percutaneous Coronary Intervention”[Mesh] OR “PCI” OR “coronary intervention”) AND (“Intravascular Ultrasound”[Mesh] OR “IVUS” OR “Optical Coherence Tomography”[Mesh] OR “OCT” OR “angiography”) |
| **Embase** | (‘artificial intelligence’/exp OR ‘machine learning’/exp OR ‘deep learning’) AND (‘quantitative coronary angiography’ OR ‘QCA’ OR ‘AI-QCA’) AND (‘percutaneous coronary intervention’/exp OR ‘PCI’ OR ‘coronary angiography’) AND (‘intravascular ultrasound’/exp OR ‘IVUS’ OR ‘optical coherence tomography’/exp OR ‘OCT’ OR ‘angiography’) |
| **Cochrane Library** | (“artificial intelligence” OR “machine learning” OR “deep learning”) AND (“quantitative coronary angiography” OR “QCA” OR “AI-QCA”) AND (“percutaneous coronary intervention” OR “PCI” OR “coronary angiography”) AND (“IVUS” OR “OCT” OR “angiography”) |

*Supplementary Table S1. Detailed Search Strategy. Comprehensive database search strategies used for study identification in PubMed, Embase, and Cochrane from 2015 to 2026, including keywords and controlled vocabulary terms related to artificial intelligence, quantitative coronary angiography, PCI, IVUS, and OCT.*

| **Study (Year)** | **Country** | **Study Design** | **Comparison** | **Population** | **Sample Size (AI / Control)** | **Total N** | **Follow-up** | **Primary Outcome** | **Secondary Outcomes** | **Key Effect Size** | **Category** |
| --- | --- | --- | --- | --- | --- | --- | --- | --- | --- | --- | --- |
| Abdul et al. (2024) | USA/Australia | Retrospective validation | AI-CCTA vs IVUS | CT dataset | - | 33 pts / 67 vessels | NA | Vessel volume correlation | Plaque volume | ρ = 0.94–0.97 | Background |
| Narula et al. (REVEALPLAQUE, 2024) | USA + Japan | Multicenter prospective | AI-CCTA vs IVUS | CAD | - | 237 pts / 432 lesions | NA | Plaque volume | Agreement | r = 0.91, slope = 0.99 | Background |

*Supplementary Table S2. Supporting Study Characteristics. Expanded summary of contextual and supporting studies relevant to AI-assisted coronary imaging and intravascular imaging–guided PCI included for background interpretation.*
