# Supplementary material
Source: Research Square preprint supplement (doi:10.21203/rs.3.rs-9743777/v1)
Supplement: Supplementary file 2 [file 549b5526815452fbc314b105.docx]

| **Study (Year)** | **Country** | **Study Design** | **Comparison** | **Population** | **Sample Size (AI / Control)** | **Total N** | **Follow-up** | **Primary Outcome** | **Secondary Outcomes** | **Key Effect Size** | **Category** |
| --- | --- | --- | --- | --- | --- | --- | --- | --- | --- | --- | --- |
| Kim et al. (FLASH, 2025) | South Korea | Multicenter RCT | AI-QCA vs OCT | CAD undergoing PCI | 199 / 196 | 395 | In-hospital | Minimal stent area | Malapposition, dissection | ΔMSA 0.16 mm²; noninferiority p<0.001 | AI vs Imaging |
| Ahn JH et al. (2025) | South Korea | Retrospective cohort | AI-QCA vs Angio | STEMI PCI | 164 / 492 | 656 | In-hospital | Procedure time | Contrast, mortality | Mean diff −4.6 min; p<0.001 | AI vs Angio |
| Lee PH et al. (GUIDE-DES, 2024) | South Korea | RCT | QCA vs IVUS  Contextual comparator | CAD PCI | 763 / 765 | 1528 | 12 months | Target lesion failure | MI, TLR, thrombosis | HR 1.00 (95% CI 0.60–1.68), p=0.99 | Context |
| Kim DH et al. (2024) | South Korea | Retrospective validation | AI-QCA vs Manual QCA | Angio dataset | - | 762 | NA | Agreement (MLD, stenosis) | Accuracy | Strong correlation (ICC 0.60–0.93) | Validation |
| Kweon et al. (2024) | South Korea | Retrospective validation | AI-QCA vs Manual QCA | Angio dataset | - | 370 | NA | Stenosis detection | Accuracy | Sensitivity 89%, DS agreement ~80% | Validation |
| Moon et al. (2023) | South Korea | Retrospective cohort | AI-QCA vs IVUS | PCI + IVUS | - | 47 pts / 54 lesions | NA | MLA correlation | Vessel area | r = 0.52–0.80, p<0.001 | Validation |
| Kwon et al. (2025) | South Korea | Prospective workflow | AI-assisted PCI | PCI patients | - | 180 cases | NA | Workflow efficiency | Usability | Time: 1.5s vs 88s, p<0.001 | Workflow |

*Table 1. Characteristics of Included Studies. Summary of study design, patient population, comparator groups, outcomes, and principal findings of studies evaluating AI-QCA in PCI.*

| **Study** | **Outcome** | **AI-QCA** | **Comparator** | **Effect Size** | **p-value** | **Interpretation** |
| --- | --- | --- | --- | --- | --- | --- |
| FLASH (2025) | Minimal stent area | 6.3 ± 2.2 | 6.2 ± 2.2 | Δ 0.16 mm² | <0.001 (NI) | Noninferior |
| FLASH (2025) | Malapposition | 13.6% | 5.6% | RR ↑ | 0.007 | Higher in AI |
| FLASH (2025) | Dissection | 15.6% | 12.8% | NS | 0.42 | No difference |
| Ahn (2025) | Procedure time | 34.9 ± 13.9 | 39.5 ± 17.1 | −4.6 min | <0.001 | Reduced |
| Ahn (2025) | Contrast volume | 132 ± 42 | 136 ± 48 | NS | 0.354 | No difference |
| Ahn (2025) | Mortality | 2.4% | 3.0% | NS | 0.692 | No difference |

*Table 2A. Comparative Outcomes from Eligible Studies. Summary of procedural and clinical outcomes comparing AI-QCA-guided PCI with intravascular imaging–guided or angiography-guided PCI across included comparative studies.*

| **Study** | **Outcome** | **Metric** | **Value** |
| --- | --- | --- | --- |
| Kim DH (2024) | MLD, % diameter stenosis | ICC | 0.60–0.93 |
| Kweon (2024) | Stenosis detection | Sensitivity | 89% |
| Moon (2023) | Minimal lumen area (MLA) | Pearson r | 0.52–0.80 |
| Kwon (2025) | Time efficiency | Mean difference | Mean difference= 86.5 s (1.5s vs 88 s) |

*Table 2B. Validation and Agreement Outcomes. Summary of agreement metrics and validation findings comparing AI-QCA measurements with manual quantitative coronary angiography and intravascular imaging modalities.*

| **Study** | **Design** | **Selection Bias** | **Measurement Bias** | **Confounding** | **Overall Risk** |
| --- | --- | --- | --- | --- | --- |
| FLASH | RCT | Low | Low | Low | Low |
| Ahn JH | Retrospective | Moderate | Low | High | Moderate |
| GUIDE-DES | RCT | Low | Low | Low | Low |
| Kim DH | Validation | Moderate | Moderate | NA | Moderate |
| Kweon | Validation | Moderate | Moderate | NA | Moderate |
| Moon | Retrospective | Moderate | Moderate | Moderate | Moderate |
| Kwon | Prospective workflow | Moderate | Low | Moderate | Moderate |

*Table 3. Risk of Bias Assessment of Included Studies. Methodological quality assessment of randomized, observational, and validation studies using the RoB 2 tool and Newcastle-Ottawa Scale according to study design.*
